# Psychiatric Services

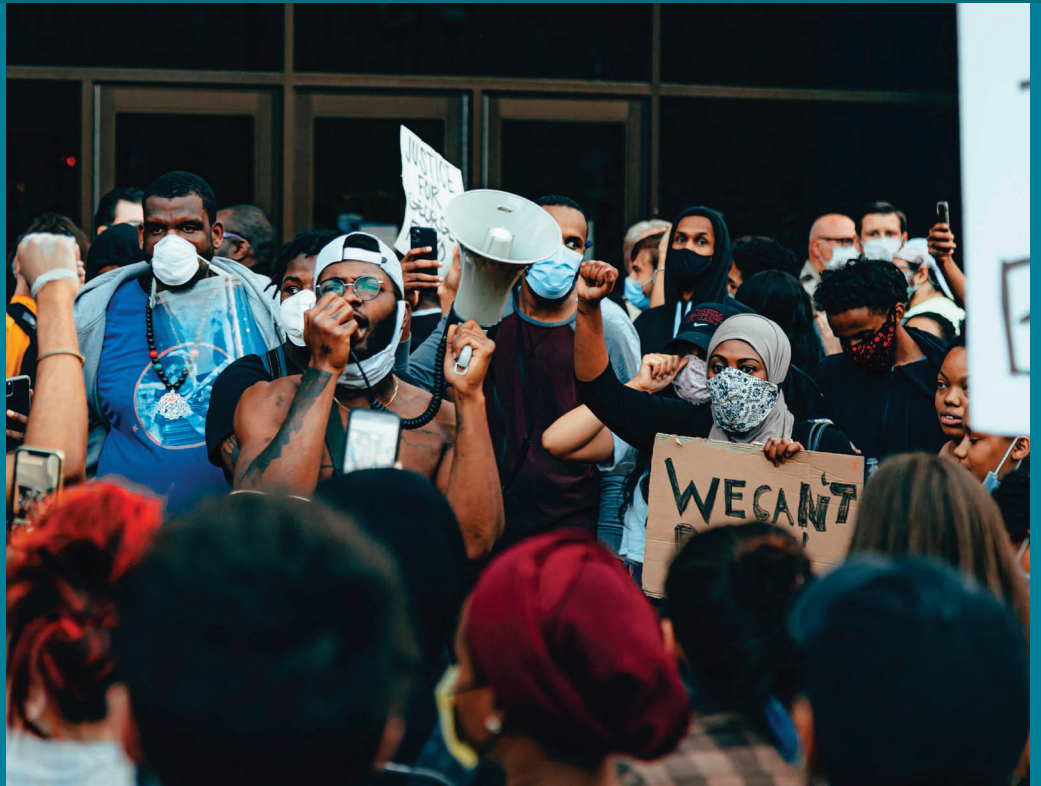

COVID-19, structural racism, and mental health inequities:  
policy implications for an emerging syndemic

Reducing suicidal behaviors with Zero Suicide best practices in mental health clinics

Lessons from Maslow: funding to support quality improvement

Supporting the mental health workforce during and after COVID-19
